# Supplementary material for: Te/C nanocomposites for Li-Te Secondary Batteries
Source: PubMed Central journal article supplement — Sci Rep. 2015 Jan 22;5:7969. doi: 10.1038/srep07969 (PMC4302299; doi:10.1038/srep07969), 2015-01-22
Supplement: srep07969-s1.pdf [file srep07969-s1.pdf]

## Supplementary Information

# Te/C nanocomposites for Li-Te Secondary Batteries

*Jeong-Uk Seo<sup>1,†</sup>, Gun-Kyu Seong<sup>1,†</sup>, and Cheol-Min Park<sup>1,2,\*</sup>*

*<sup>1</sup>School of Materials Science and Engineering, Kumoh National Institute of Technology, Gumi,  
Gyeongbuk 730-701, Republic of Korea*

*<sup>2</sup>Outstanding Research Group Program, Convergence Technology Research Institute, Kumoh  
National Institute of Technology, Gumi, Gyeongbuk 730-701, Republic of Korea*

*<sup>†</sup> These authors contributed equally to this work.*

*\*E-mail: cmpark@kumoh.ac.kr*

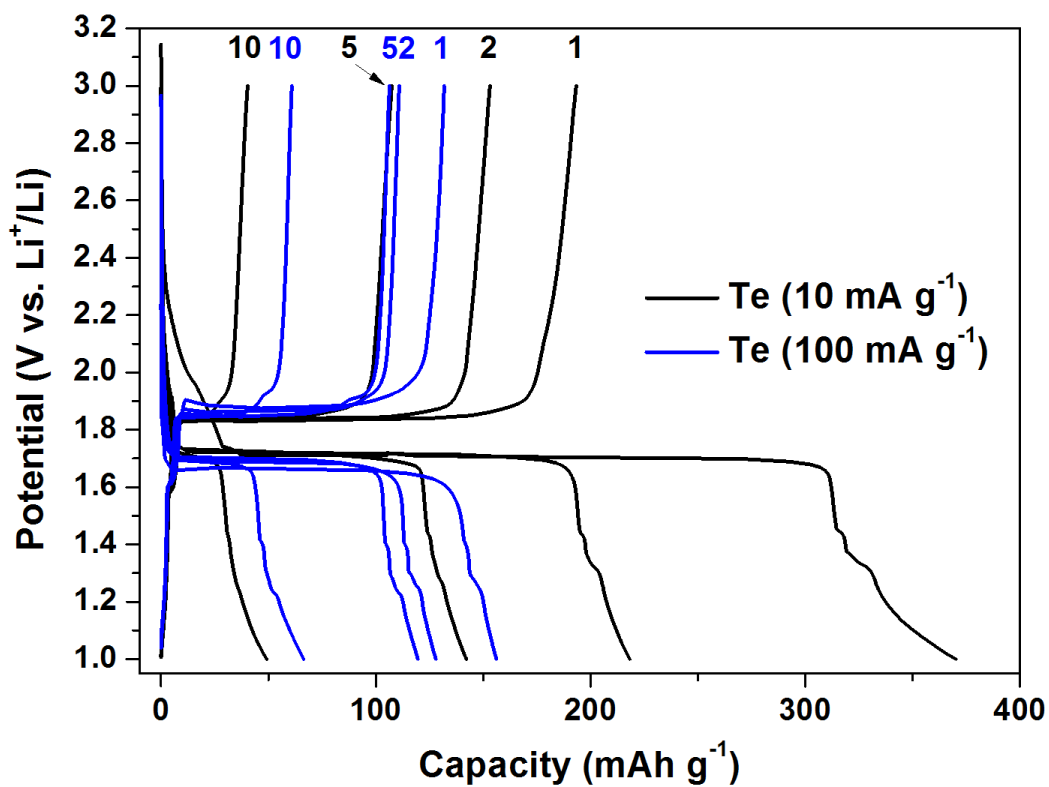

**Figure S1.** Voltage profiles (potential vs. gravimetric capacity) of Te electrode at various current densities of 10 and 100  $\text{mA g}^{-1}$ .

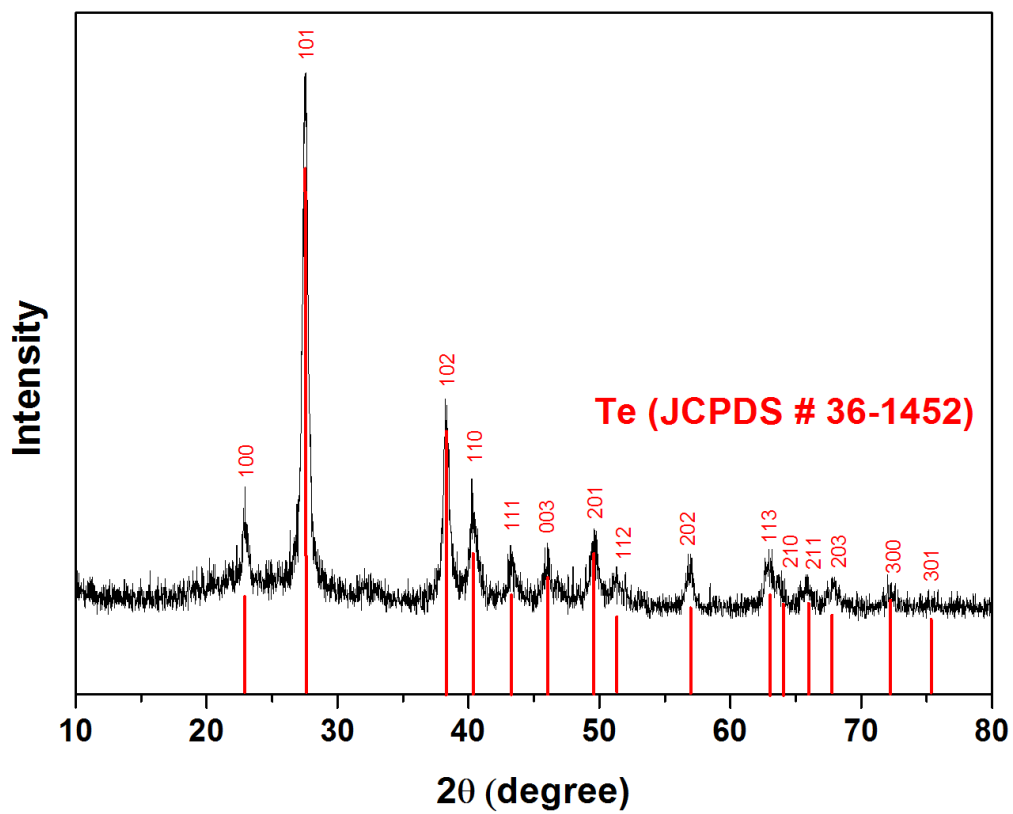

**Figure S2.** XRD pattern of the Te/C nanocomposite prepared by HEMM.

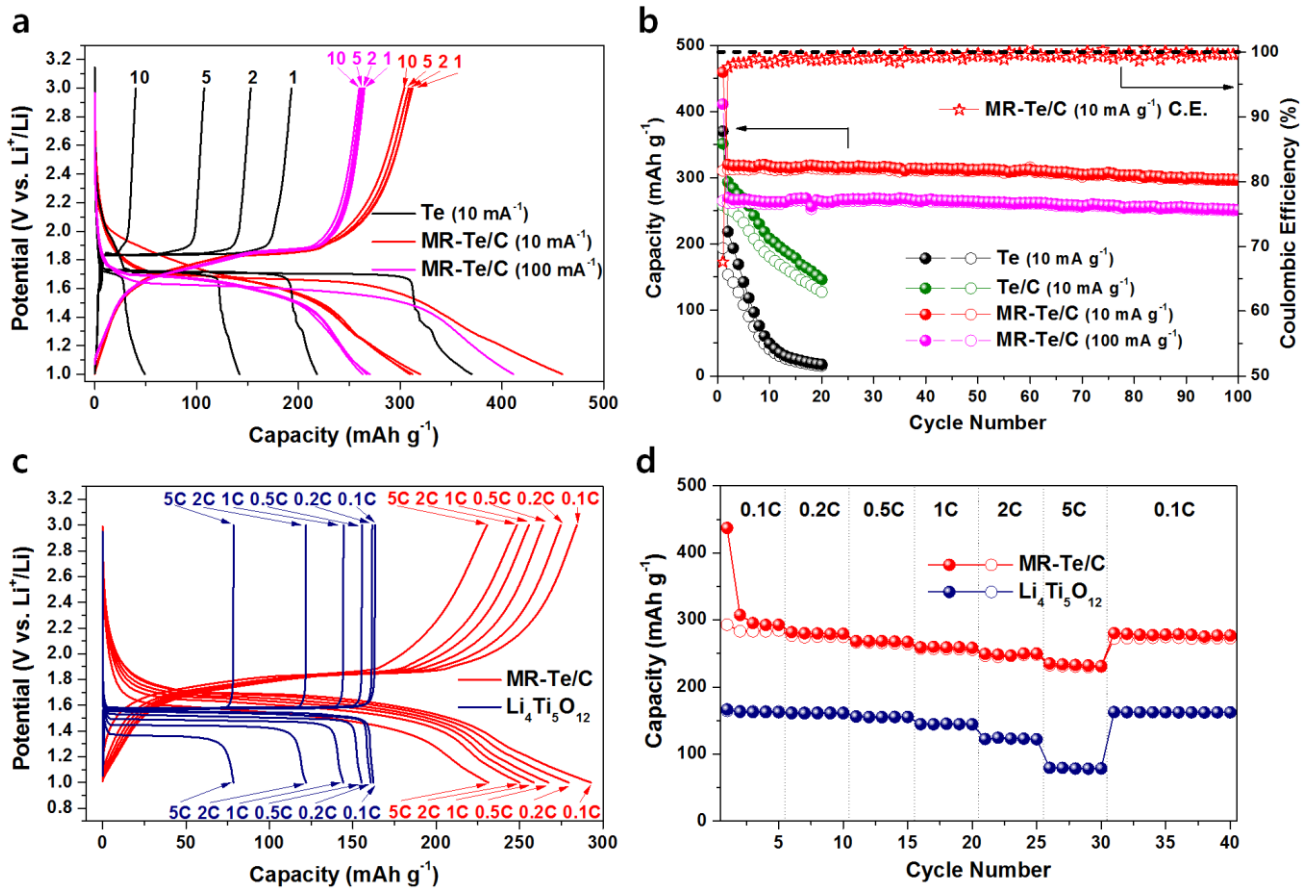

**Figure S3.** Electrochemical behaviors of MR-Te/C nanocomposite electrode on the basis of gravimetric capacity. (a) Voltage profiles of Te (current density:  $10 \text{ mA g}^{-1}$ ) and MR-Te/C nanocomposite electrodes (current density:  $10$  and  $100 \text{ mA g}^{-1}$ ). (b) Cycling performances of Te, Te/C nanocomposite, and MR-Te/C nanocomposite electrodes at cycling rates of  $10 \text{ mA g}^{-1}$  or  $100 \text{ mA g}^{-1}$ . (c) Voltage profiles at various C rates for  $\text{Li}_4\text{Ti}_5\text{O}_{12}$  and MR-Te/C nanocomposite electrodes. (d) Plot of the discharge and charge capacity vs. cycle number for  $\text{Li}_4\text{Ti}_5\text{O}_{12}$  and MR-Te/C nanocomposite electrodes at various C rates ( $\text{Li}_4\text{Ti}_5\text{O}_{12}$  - 1C:  $170 \text{ mA h g}^{-1}$ , MR-Te/C nanocomposite - 1C:  $300 \text{ mA h g}^{-1}$ ).

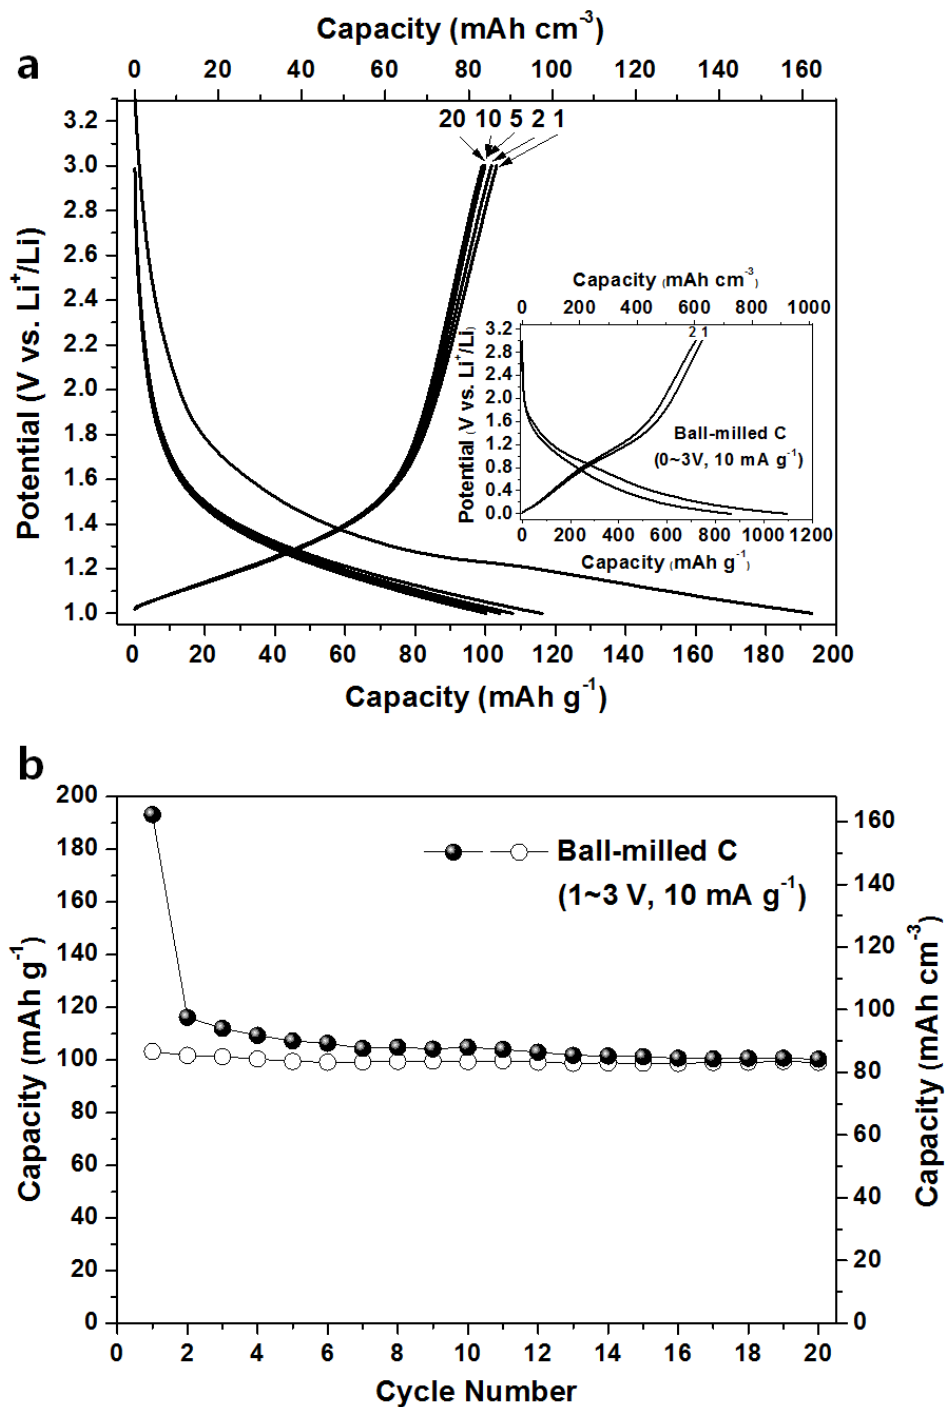

**Figure S4.** Electrochemical characteristics of ball-milled amorphous C (Super P®). (a) Plot of potential vs. gravimetric and volumetric capacities in the potential range between 1.0 and 3.0 V. (inset: voltage profile in the potential range between 0.0 and 3.0 V). (b) Cycling performance of ball-milled amorphous C electrode at cycling rate of 10 mA g<sup>-1</sup> in the potential range between 1.0 and 3.0 V.

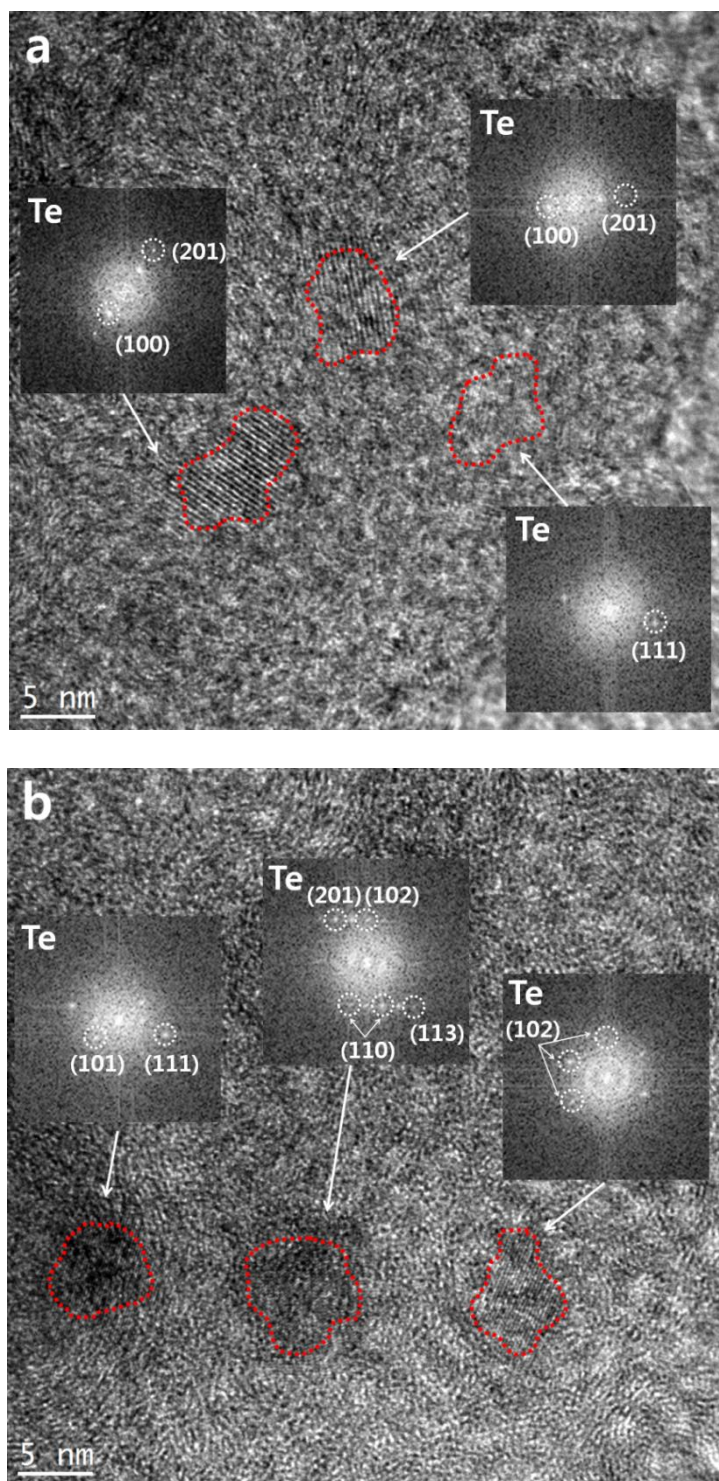

**Figure S5.** Characterization of Te nanocrystallites in MR-Te/C nanocomposite electrodes. (a) HRTEM image with FT patterns of the MR-Te/C nanocomposite electrode after the 10th cycle. (b) HRTEM image with FT patterns of the MR-Te/C nanocomposite electrode after the 50th cycle.
